# Supplementary material for: Trap-tuning in afterglow perovskite crystals through alkali metal ion doping
Source: Royal Society of Chemistry journal article supplement (doi:10.1039/d2cc03770j), 2022-01-01
Supplement: d2cc03770j1.pdf [file d2cc03770j1.pdf]

## **Supporting Information**

### **Trap-tuning in Afterglow Perovskite Crystals through Alkali Metal**

#### **Ion Doping**

Yihan Shi,<sup>a</sup> Xiangzhou Zhang,<sup>a</sup> Xiangxiang Chen,<sup>a</sup> Yuhai Zhang<sup>\*,a</sup>

<sup>a</sup> Institute for Advanced Interdisciplinary Research (iAIR), University of Jinan, Jinan  
250022, Shandong, P. R. China

## Experimental Section

### Chemicals:

Cesium chloride (CsCl, 99.9%), manganese chloride (MnCl<sub>2</sub>, 99%), potassium chloride (KCl, 99.5%) and silver chloride (AgCl, 99.5%) were purchased from Shanghai Macklin Biochemical Co., Ltd., China. Indium chloride (InCl<sub>3</sub>, 99.9%) was purchased from Shanghai Yien Chemical Technology Co., Ltd., China. Lithium chloride (LiCl, 99.9%) was purchased from Shanghai Aladdin Biochemical Co., Ltd., China. Hydrochloric acid (HCl, 36.0~38.0%) was purchased from Tianjin Fuyu Fine Chemical Co., Ltd., China. All chemicals were used as received without further purification.

### Synthesis of Perovskite Single Crystal.

Cs<sub>2</sub>Li<sub>x</sub>Ag<sub>1-x</sub>InCl<sub>6</sub>:20%Mn and Cs<sub>2</sub>K<sub>x</sub>Ag<sub>1-x</sub>InCl<sub>6</sub>:20%Mn were synthesized by hydrothermal reaction.<sup>1</sup> In a typical synthesis for Cs<sub>2</sub>Li<sub>0.6</sub>Ag<sub>0.4</sub>InCl<sub>6</sub>:20%Mn single crystals, 2 mmol CsCl, 1 mmol InCl<sub>3</sub>, 0.6 mmol LiCl, 0.4 mmol AgCl, 0.2 mmol MnCl<sub>2</sub> and 12 ml concentrated hydrochloric acid (12 M) were loaded in a 25 ml Teflon vessel. The vessel was sealed in a steel cup and kept in muffle furnace at 180 °C for 12 hours, then slowly cooled to room temperature at a rate of 2.8 °C /h. The as-synthesized crystals were rinsed with isopropyl alcohol and dried on filter paper.

### X-ray Diffraction Measurements.

Single crystals were grounded into powders before XRD measurement. Powder X-ray diffraction (XRD) patterns were collected on an X-ray diffractometer (Rigaku Ultima IV) coupled with Cu-Kα radiation ( $\lambda = 1.5406 \text{ \AA}$ ). The scanning rate was set at 10 °/min with a step size of 0.02°.

### Steady-State Measurements of Photoluminescence, Afterglow decay and PL QY.

The measurement of the PLE, PL, afterglow decay and PL QY were conducted in a spectrometer (FS5, Edinburgh Instruments) equipped with an integrated sphere of polytetrafluoroethylene (PTFE) lining.

#### **Photoluminescence Lifetime Measurement.**

The transient photoluminescence spectra of single crystals were obtained with a time-resolved spectrometer (Delta-flex, Horiba Scientific). A pulsed 355-nm LED lamp was used as the excitation source and the time window was set at 750 ms.

#### **Optical Photographs of Single Crystals.**

Optical photographs of single crystals were taken by Canon 90D camera. Exposure time for samples in daylight, 365-nm UV lamp excitation and afterglow was set at 1/6 s, 1/6 s and 3.2 s, respectively. ISO of the photographs were 1000, 6400 and 25600, respectively.

#### **Thermoluminescence Measurement.**

The crystal was excited by 365-nm UV lamp for 5 min and allowed to standby for 1 min. The sample was heated from 123 K to 473 K during which time the TL intensity was recorded by a sensitive power meter (918D-UV-OD3R, 1936-R, Newport power Meter). A temperature module (HCS421VXY, Instec, Shanghai Hengshang Precision Instrument Co., LTD) was used for accurate temperature control, and the heating rate was set at 150 °C/min.

**Table S1.** Elemental analysis of  $\text{Cs}_2\text{K}_x\text{Ag}_{1-x}\text{InCl}_6:20\%\text{Mn}$  single crystals by EDS.

| Nominal ratio of K/(K+Ag)<br>(%) | Actual ratio of K/(K+Ag)<br>(%) | Actual molar ratio of Mn<br>(%) |
|----------------------------------|---------------------------------|---------------------------------|
| 5                                | 13.44                           | 1.28                            |
| 10                               | 17.79                           | 2.54                            |
| 20                               | 21.33                           | 2.53                            |
| 40                               | 19.89                           | 2.24                            |
| 60                               | 24.25                           | 2.19                            |

**Table S2.** PL QY of crystals with varied K and Li doping contents. The error bars were obtained by three parallel measurements in an integrated sphere.

| Dopant concentration<br>(mol%) |                     | 0             | 10            | 20            | 40            | 60            |
|--------------------------------|---------------------|---------------|---------------|---------------|---------------|---------------|
| PL QY                          | K-doped<br>crystal  | 1.14±0.<br>06 | 2.04±0.<br>27 | 1.83          | 2.33±0.<br>23 | 3.31±0.2<br>4 |
|                                | Li-doped<br>crystal | 1.14±0.<br>06 | 2.18±0.<br>15 | 2.04±0.<br>11 | 2.04±0.<br>05 | 2.83±0.1<br>9 |

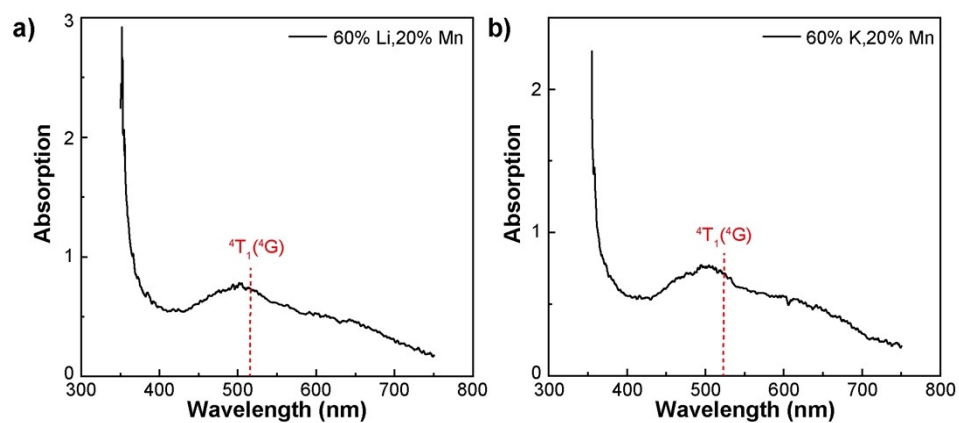

**Figure S1.** Absorption spectra of crystals doped with Li (a) and K (b) ions, respectively, showing a fingerprint peak of Mn<sup>2+</sup> ions.

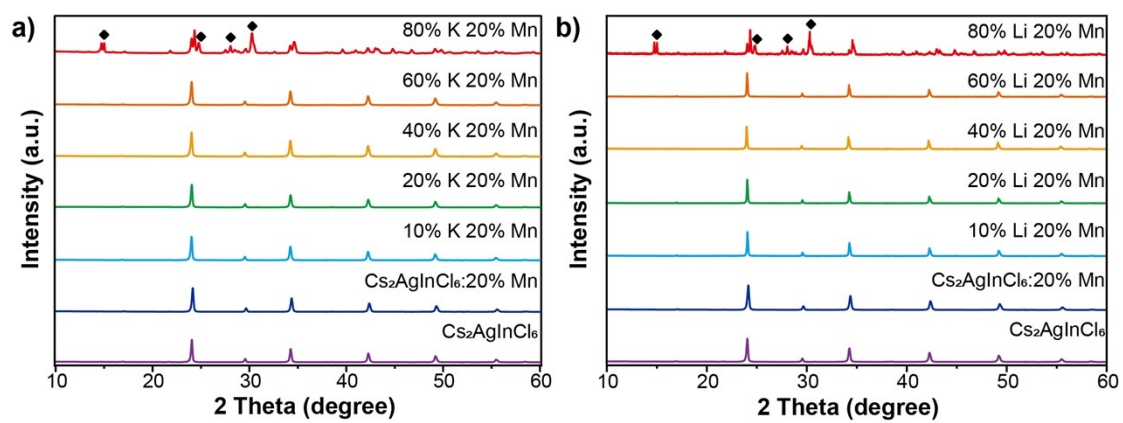

**Figure S2.** X-ray diffraction patterns (XRD) of (a)  $\text{Cs}_2\text{K}_x\text{Ag}_{1-x}\text{InCl}_6:20\%\text{Mn}$  ( $x = 0, 0.1, 0.2, 0.4, 0.6, 0.8$ ) and (b)  $\text{Cs}_2\text{Li}_x\text{Ag}_{1-x}\text{InCl}_6:20\%\text{Mn}$  ( $x = 0, 0.1, 0.2, 0.4, 0.6, 0.8$ ) crystals. The cubes represented the impurity phase.

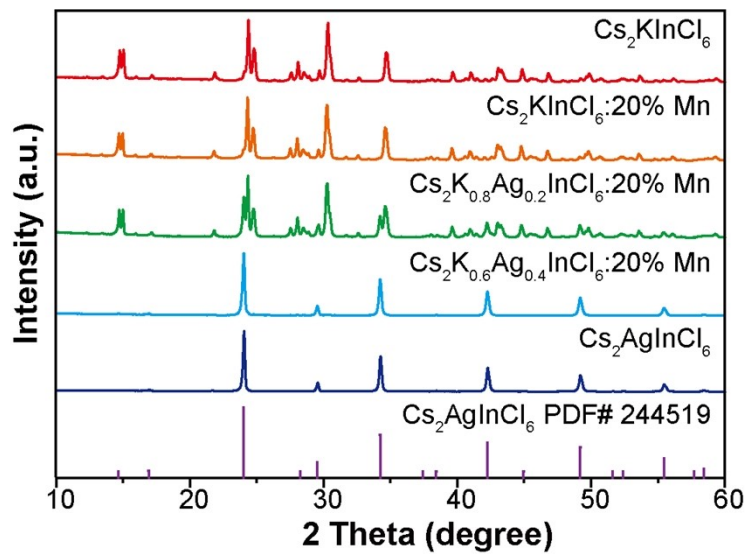

**Figure S3.** X-ray diffraction patterns of crystals with different doping contents, showing a clear phase separation at heavy doping level of K ions (80%).



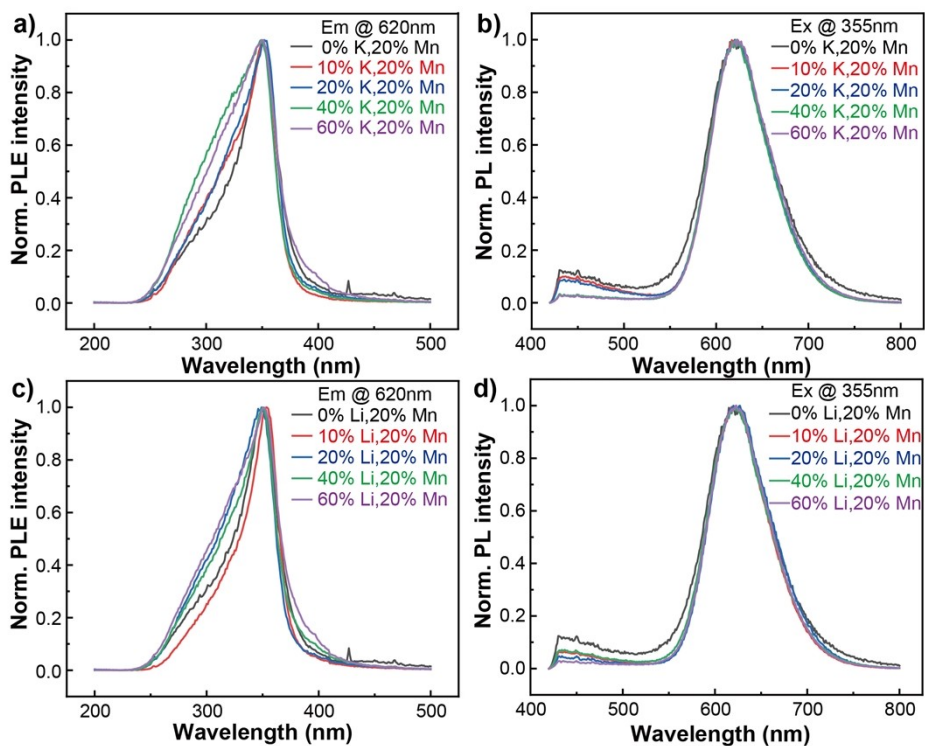

**Figure S4.** Normalized PLE and PL spectra of  $\text{Cs}_2\text{AgInCl}_6:20\%\text{Mn}$  crystals doped with varied amount of K (a, and b) and Li ions (c, and d), respectively. It can be seen that the alkali metal ion contents did not affect the profile of PLE and PL from  $\text{Mn}^{2+}$  ions.

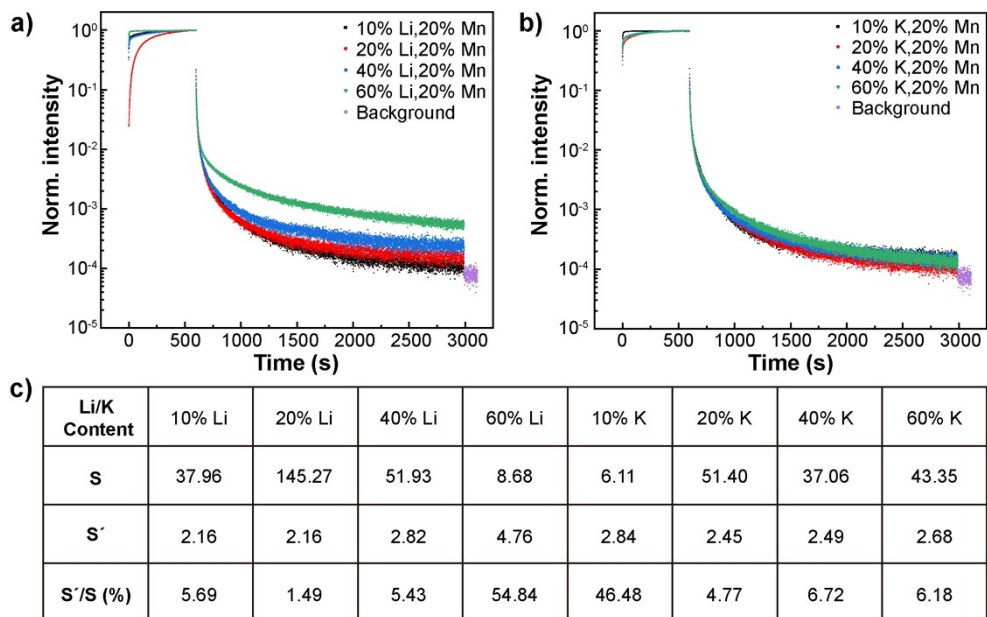

**Figure S5.** Afterglow profiles of (a)  $\text{Cs}_2\text{Li}_x\text{Ag}_{1-x}\text{InCl}_6:20\%\text{Mn}$  ( $x = 0.1, 0.2, 0.4, 0.6$ ) and (b)  $\text{Cs}_2\text{K}_x\text{Ag}_{1-x}\text{InCl}_6:20\%\text{Mn}$  ( $x = 0.1, 0.2, 0.4, 0.6$ ) crystals. (c) The integrated area,  $S$  and  $S'$ , and their ratio, were listed in the table.

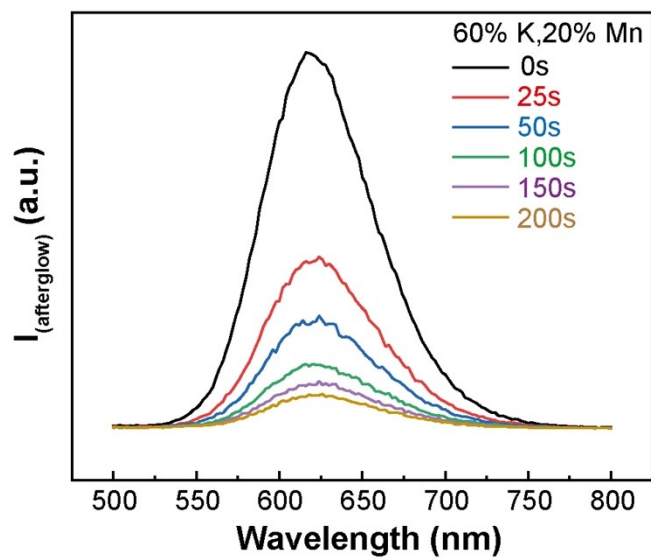

**Figure S6.** Afterglow emission spectra of Cs<sub>2</sub>K<sub>0.6</sub>Ag<sub>0.4</sub>InCl<sub>6</sub>:20%Mn crystals were obtained at varied delay times. Before the test, the crystals were charged by Xe lamp for 5 minutes, and the excitation wavelength was set at 355 nm.

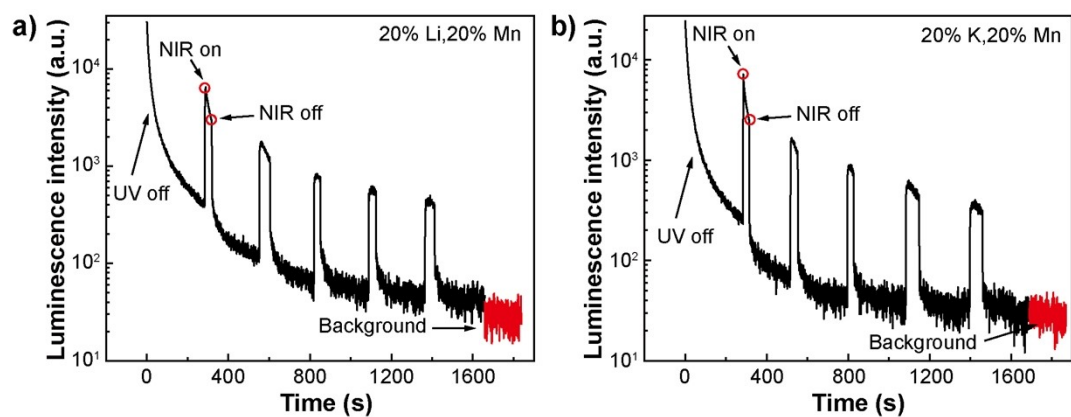

**Figure S7.** Photo-stimulated decay curves (by a 980-nm laser) of the  $\text{Cs}_2\text{Li}_{0.2}\text{Ag}_{0.8}\text{InCl}_6:20\%\text{Mn}$  (a) and  $\text{Cs}_2\text{K}_{0.2}\text{Ag}_{0.8}\text{InCl}_6:20\%\text{Mn}$  single crystals (b), respectively. The 365-nm UV lamp was used for charging for 5 min and allowed to standby for another 5 min. The stimulation was conducted by 980-nm excitation for 30 s.

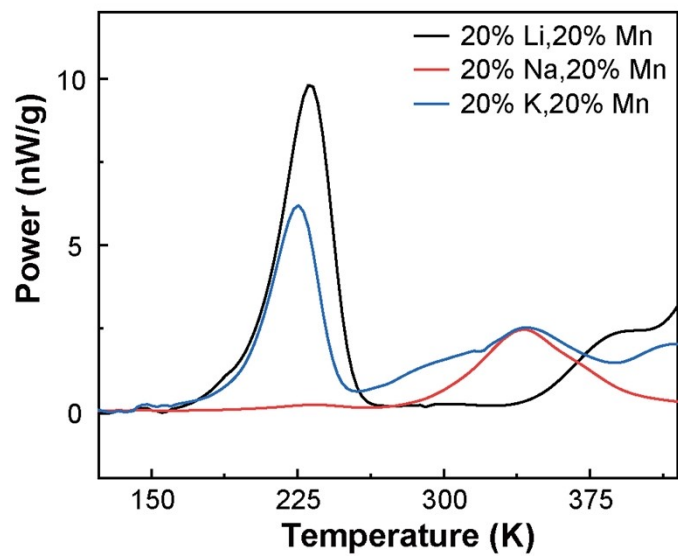

**Figure S8.** Thermoluminescence curves of single crystals doped with varied content of alkali metal ions. All samples were excited by 365-nm UV lamp for 5 min and allowed to standby for 1 min before measurement.

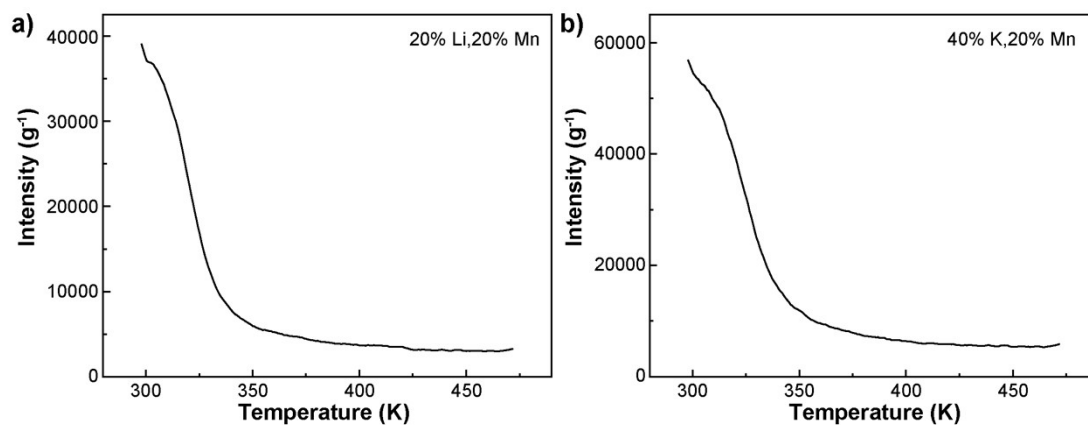

**Figure S9.** TL curves monitored at 620 nm emission wavelength from 298 to 470 K for Li<sup>+</sup> and K<sup>+</sup> doped single crystals. The crystals were pre-irradiated with a 365-nm UV lamp for 5 min.

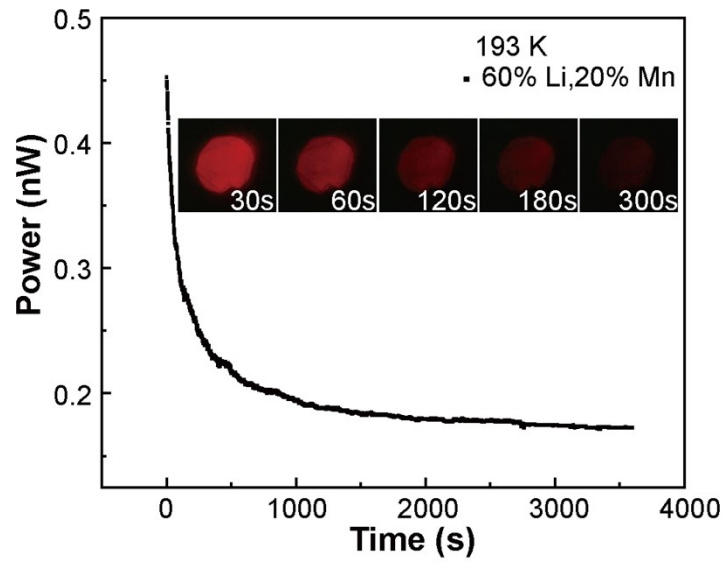

**Figure S10.** The afterglow decay curve of  $\text{Cs}_2\text{Li}_{0.6}\text{Ag}_{0.4}\text{InCl}_6: 20\%\text{Mn}$  crystals at 193 K. The inset showed the crystals photographs at different decay times.

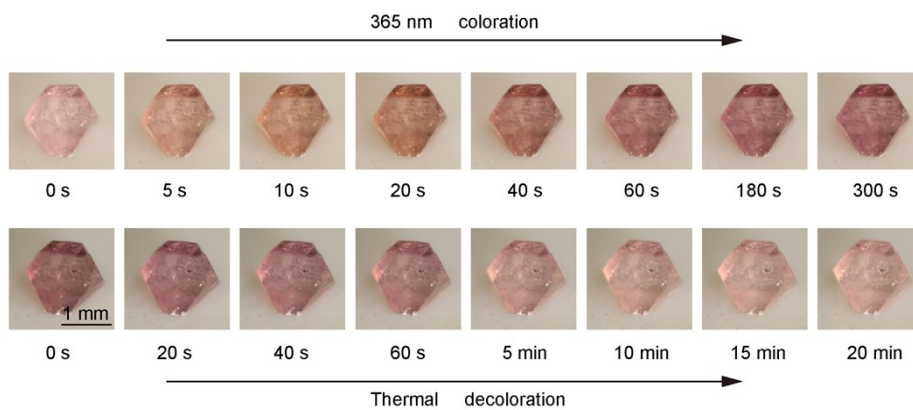

**Figure S11.** Under the irradiation of 365-nm ultraviolet lamp ( $3 \text{ mW/cm}^2$ ), the  $\text{Cs}_2\text{Li}_{0.4}\text{Ag}_{0.6}\text{InCl}_6:20\%\text{Mn}$  crystal had obvious photochromism, the color was from light pink to dark purple. When heated on a 423 K hot plate, the crystal became lighter again. The exposure time and ISO of optical photographs were 1/4 s and 640, respectively.



**Reference:**

1. W. Zheng, X. Li, N. Liu, S. Yan, X. Wang, X. Zhang, Y. Liu, Y. Liang, Y. Zhang and H. Liu, *Angew. Chem. Int. Ed.*, 2021, **60**, 24450-24455.
